# Supplementary material for: Intratumoral OH2, an oncolytic herpes simplex virus 2, in patients with advanced solid tumors: a multicenter, phase I/II clinical trial
Source: HighWire-hosted journal article supplement (doi:10.1136/jitc-2020-002224), 2021-04-01
Supplement: jitc-2020-002224supp001_data_supplement.pdf [file jitc-2020-002224supp001_data_supplement.pdf]

## 1. Supplementary Figure

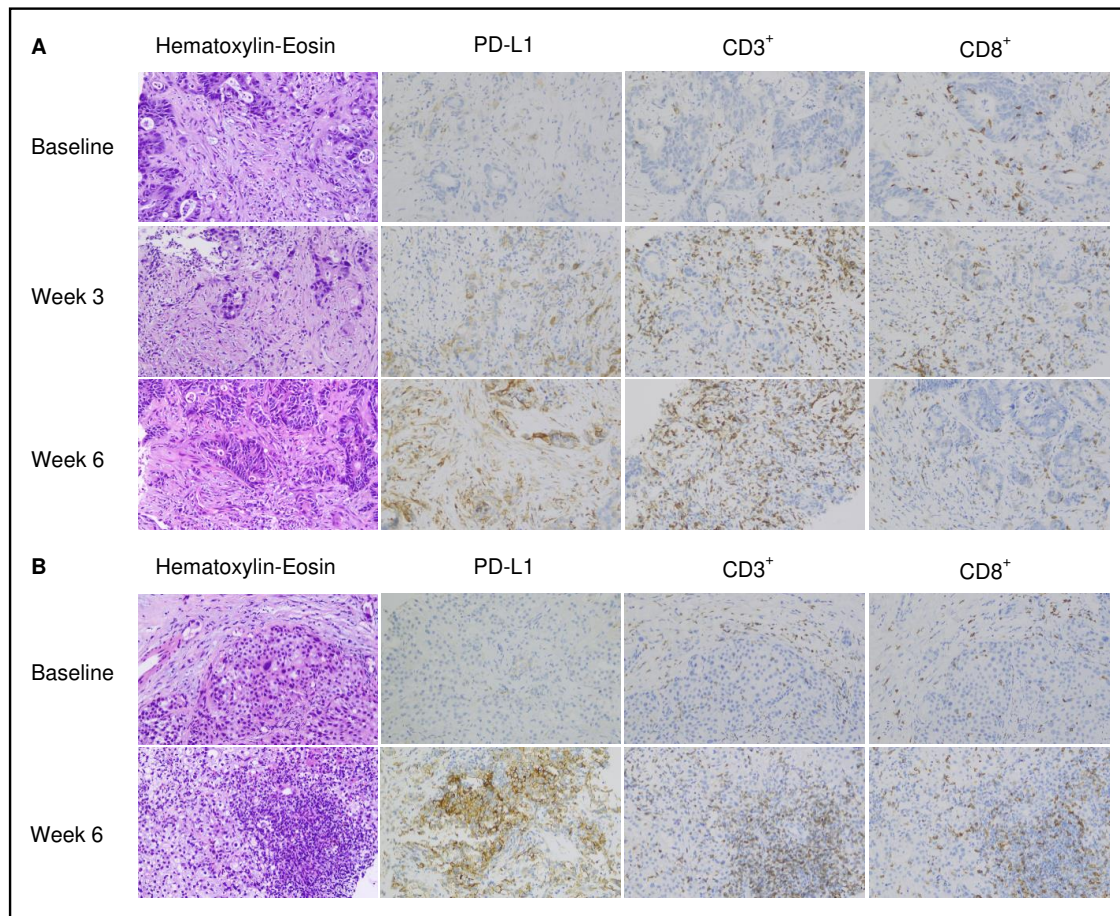

**Supplementary Figure 1: OH2 injection increased PD-L1 expression, attracted CD3<sup>+</sup> and CD8<sup>+</sup> lymphocytes in the tumor microenvironment regardless of clinical response (magnification ×200).**

(A) Patient with liver metastases from rectal cancer who responded to single agent OH2. (B) Patient with liver metastases from esophageal cancer who had progressive disease after treatment with single agent OH2.

## 2. Supplementary Table

Supplementary Table 1 Biodistribution and activity of single agent OH2 in phase 2

| Patient | Dose level<br>(CCID50/mL) | Tumor Types                        | Blood OH2 viral<br>loads (copies/ $\mu$ L,<br>timepoint) | Blood anti-GM-CSF<br>antibody (timepoint) | Best response<br>(RECIST<br>v1.1/iRECIST) |
|---------|---------------------------|------------------------------------|----------------------------------------------------------|-------------------------------------------|-------------------------------------------|
| 12      | $10^7$                    | Esophageal cancer                  | BQL                                                      | Negative                                  | PD/iUPD                                   |
| 13      | $10^7$                    | Esophageal cancer                  | BQL                                                      | Negative                                  | PD/iUPD                                   |
| 14      | $10^7$                    | Esophageal cancer                  | BQL                                                      | Negative                                  | PD/iUPD                                   |
| 15      | $10^7$                    | Colon cancer                       | BQL                                                      | Negative                                  | NA                                        |
| 16      | $10^7$                    | Colon cancer                       | BQL                                                      | Negative                                  | SD/iSD                                    |
| 17      | $10^7$                    | Rectal cancer                      | BQL                                                      | Negative                                  | PD/iUPD                                   |
| 18      | $10^7$                    | Colon cancer                       | BQL                                                      | Negative                                  | PD/iUPD                                   |
| 19      | $10^7$                    | Colon cancer                       | BQL                                                      | Negative                                  | PD/iUPD                                   |
| 20      | $10^7$                    | Colon cancer                       | BQL                                                      | Negative                                  | PD/iUPD                                   |
| 21      | $10^7$                    | Esophageal cancer                  | BQL                                                      | Negative                                  | NA                                        |
| 22      | $10^7$                    | Intrahepatic<br>cholangiocarcinoma | BQL                                                      | Negative                                  | PD/iUPD                                   |
| 23      | $10^7$                    | Colon cancer                       | BQL                                                      | Negative                                  | PD/iUPD                                   |
| 24      | $10^7$                    | Colon cancer                       | BQL                                                      | Negative                                  | PD/iUPD                                   |
| 25      | $10^7$                    | Appendix cancer                    | NA                                                       | NA                                        | SD/iSD                                    |
| 26      | $10^7$                    | Gastric cancer                     | NA                                                       | NA                                        | SD/iSD                                    |
| 27      | $10^7$                    | Esophageal cancer                  | NA                                                       | NA                                        | SD/iSD                                    |
| 28      | $10^7$                    | Gastric cancer                     | NA                                                       | NA                                        | NA                                        |
| 29      | $10^7$                    | Gastric cancer                     | NA                                                       | NA                                        | NA                                        |

(Continued on the following page)

Supplementary Table 1 Biodistribution and activity of single agent OH2 in phase 2 (cont'd)

| Patient | Dose level<br>(CCID50/mL) | Tumor Types             | Blood OH2 viral<br>loads (copies/ $\mu$ L,<br>timepoint) | Blood anti-GM-CSF<br>antibody (timepoint) | Best response<br>(RECIST<br>v1.1/iRECIST) |
|---------|---------------------------|-------------------------|----------------------------------------------------------|-------------------------------------------|-------------------------------------------|
| 30      | $10^7$                    | Esophageal cancer       | BQL                                                      | Negative                                  | NA                                        |
| 31      | $10^7$                    | Esophageal cancer       | BQL                                                      | Negative                                  | PD/iUPD                                   |
| 32      | $10^7$                    | Malignant melanoma      | BQL                                                      | Negative                                  | NA                                        |
| 33      | $10^7$                    | Skin cancer             | NA                                                       | Negative                                  | PD/iUPD                                   |
| 34      | $10^7$                    | Esophageal cancer       | NA                                                       | Negative                                  | PD/iUPD                                   |
| 35      | $10^7$                    | Malignant melanoma      | NA                                                       | NA                                        | NA                                        |
| 36      | $10^7$                    | Esophageal cancer       | NA                                                       | NA                                        | NA                                        |
| 37      | $10^7$                    | Malignant melanoma      | BQL                                                      | Negative                                  | PD/iUPD                                   |
| 38      | $10^7$                    | Head and neck<br>cancer | NA                                                       | NA                                        | PD/iUPD                                   |
| 39      | $10^7$                    | Rectal cancer           | NA                                                       | NA                                        | NA                                        |
| 40      | $10^7$                    | Gastric cancer          | NA                                                       | NA                                        | SD/iSD                                    |

Abbreviations: BQL, below quantifiable limit; PD, progressive disease; SD, stable disease; iUPD, immune-unconfirmed progressive disease; NA, not available
